# Supplementary material
Source: PubMed Central journal article supplement (PMC5228240)
Supplement: JCM.01637-16_zjm999095326s2.pdf [file JCM.01637-16_zjm999095326s2.pdf]

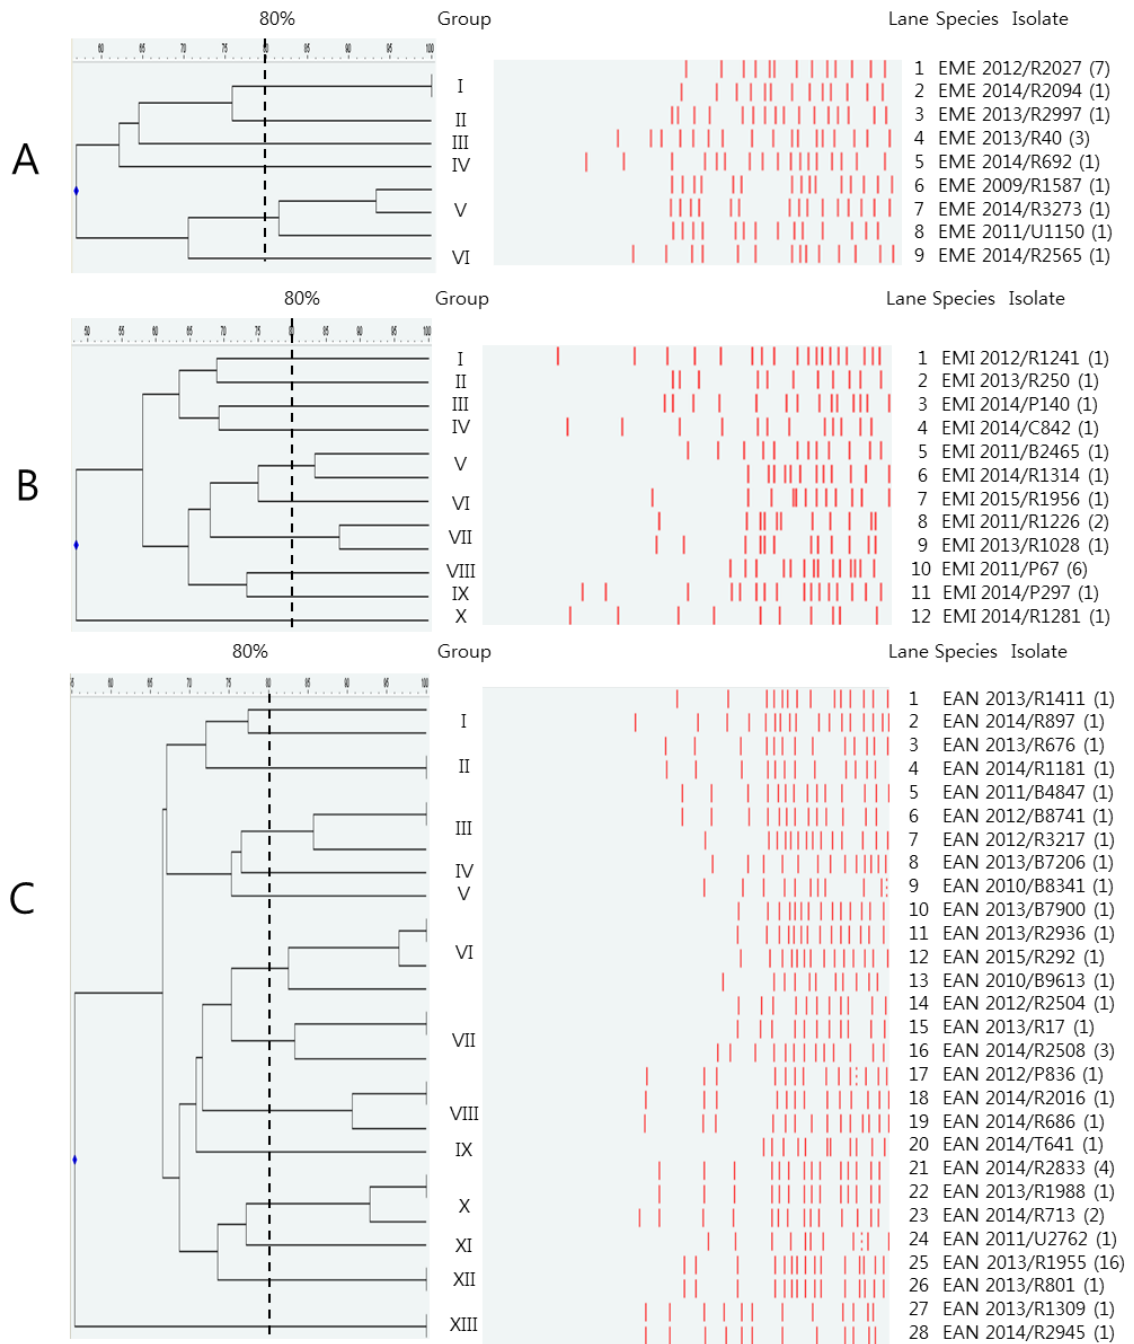

Fig. S1 The patterns were analyzed using InfoQuest FP software (Bio-Rad) to generate dendrograms based on the unweighted pair group method with an arithmetic average (UPGMA) from the Dice coefficient. Among 86 *Elizabethkingia* species: (A) 17 *E. meningoseptica* (EME); (B) 18 *E. miricola* (EMI); (C) 49 *E. anophelis* (EAN). Representative isolate was noted in each lane and the number in parentheses was the total number of isolates exhibiting the same band pattern. PFGE analysis revealed that 17 *E. meningoseptica* isolates belonged to 6 different groups (pulsotypes) with 8 isolates belonging to group I, 18 *E. miricola* isolates belonged to 10 different groups with 6 isolates belonging to group VIII, 49 of 51 *E. anophelis* isolates belonged to 13 different groups with 17 isolates belonging to group XII.
